# Supplementary material for: UV-B Radiation as Abiotic Elicitor to Enhance Phytochemicals and Development of Red Cabbage Sprouts
Source: MDPI journal article supplement (doi:10.3390/horticulturae7120567), 2021-12-09
Supplement: s1 [file s1]

# Supplementary Materials: UV-B Radiation as Abiotic Elicitor to Enhance Phytochemicals and Development of Red Cabbage Sprouts

Lorena Martínez-Zamora, Noelia Castillejo and Francisco Artés-Hernández \*

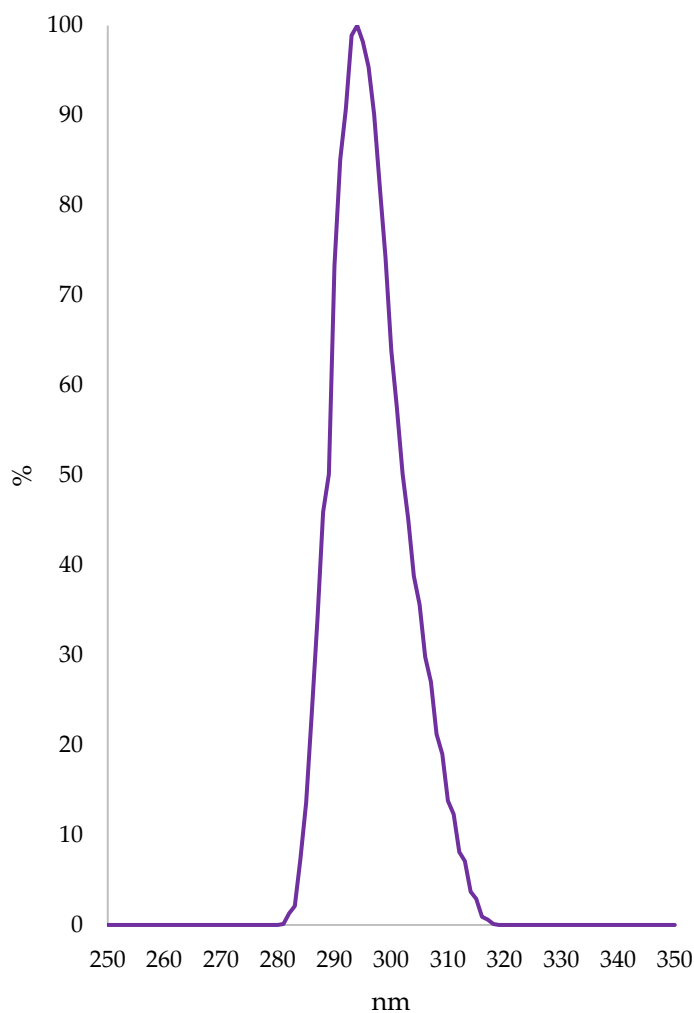

**Figure S1.** UV-B ( $\lambda$  280 - 315 nm) spectrum, peak in 294 nm, provided by UV-B unfiltered emitting lamps (TL 40W/01 RS; Philips, Eindhoven, The Netherlands). Data provided by the supplier.
